# Supplementary material for: Overexpression of BIRC6 driven by EGF-JNK-HECTD1 signaling is a potential therapeutic target for triple-negative breast cancer
Source: PubMed Central journal article supplement — Mol Ther Nucleic Acids. 2021 Sep 28;26:798–812. doi: 10.1016/j.omtn.2021.09.011 (PMC8526501; doi:10.1016/j.omtn.2021.09.011), 2021-09-28
Supplement: mmc1.pdf [file mmc1.pdf]

OMTN, Volume 26

## **Supplemental information**

**Overexpression of BIRC6 driven by**

**EGF-JNK-HECTD1 signaling is a potential therapeutic target for triple-negative breast cancer**

**Yongpeng Li, Yanan Tan, Lijuan Wen, Zhihao Xing, Changxu Wang, Liuhui Zhang, Kai Wu, Haiyan Sun, Yuqing Li, Qifang Lei, and Song Wu**

## Supplemental Data list:

Fig. S1 (related to Fig. 2) The EGF-JNK Signaling Regulates BIRC6 Stability.

Fig. S2 (related to Fig. 4) BIRC6 Promotes TNBC Cell Growth and Tumorigenesis by Blocking SMAC-Mediated Apoptosis.

Fig. S3 (related to Fig. 5) BIRC6 Decreases SMAC Expression by Regulating Ubiquitination in TNBC.

Fig. S4 (related to Fig. 6) pCLNs Can Efficiently Deliver the BIRC6-siRNA into TNBC Cells *in vitro* and *in vivo*.

Fig. S5 (related to Fig. 7) pCLNs/siBIRC6 Complex is safe for TNBC therapy.

Table S1 The oligonucleotide sequences for shRNA interference.

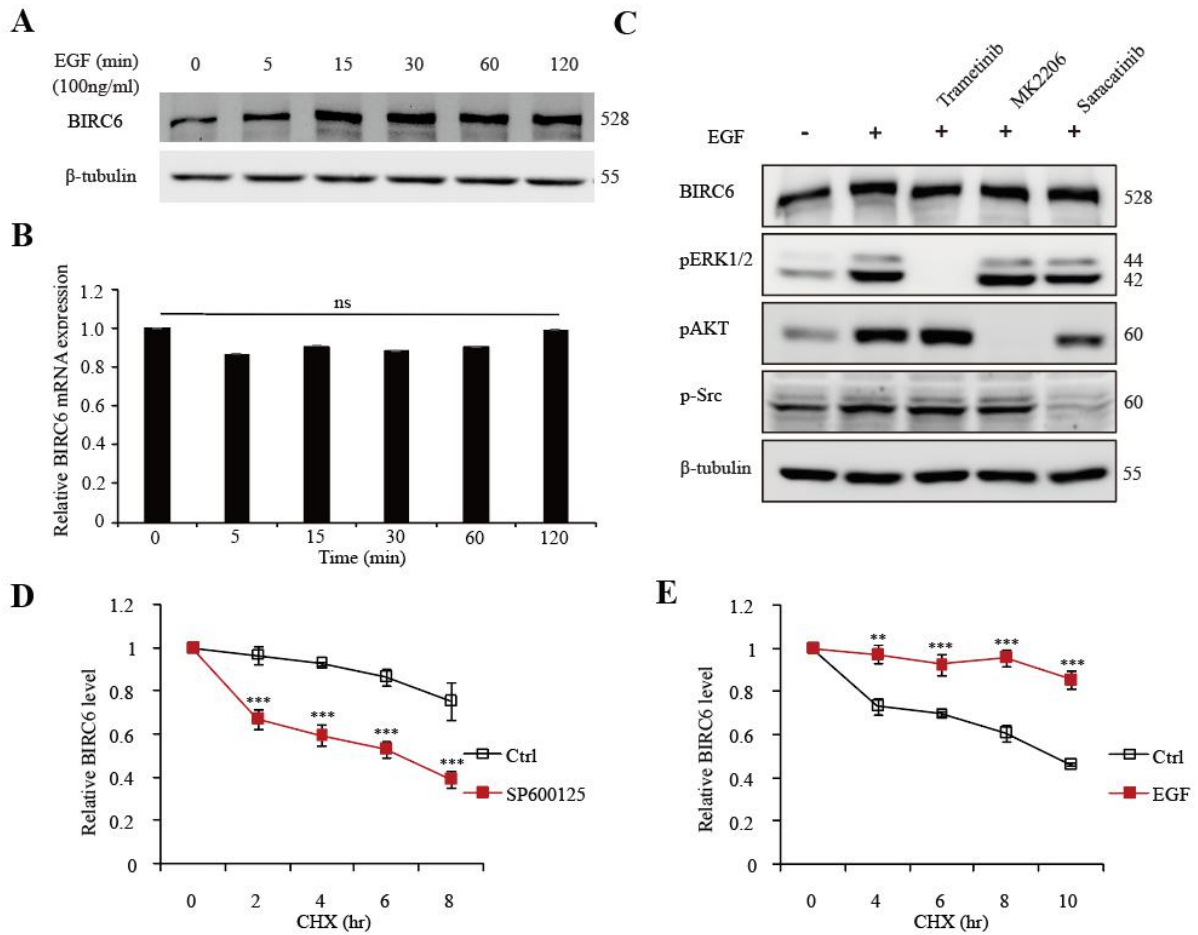

**Fig. S1 (related to Fig. 2). The EGF-JNK Signaling Regulates BIRC6 Stability.** (A) After serum starved for 48 hr, Hs578T cells were treated with EGF for the indicated times. Immunoblot analysis was performed to measure the protein levels of BIRC6. (B) After serum starvation, Hs578T cells were treated with EGF (100 ng/ml) for the indicated times. qRT-PCR analysis was performed to measure the mRNA levels of BIRC6. Data are means  $\pm$  SD. (C) After serum starvation, Hs578T cells were treated with inhibitors to MEK (trametinib), AKT (MK2206), Src (saracatinib) for 1.5 hr and then treated with EGF (100 ng/ml) for 30 min. Equal amounts of cell lysates were immunoblotted with the indicated antibodies. (D-E) Quantification of BIRC6 protein levels in Figure 2E (D) and Figure 2F (E) from three independent experiments.

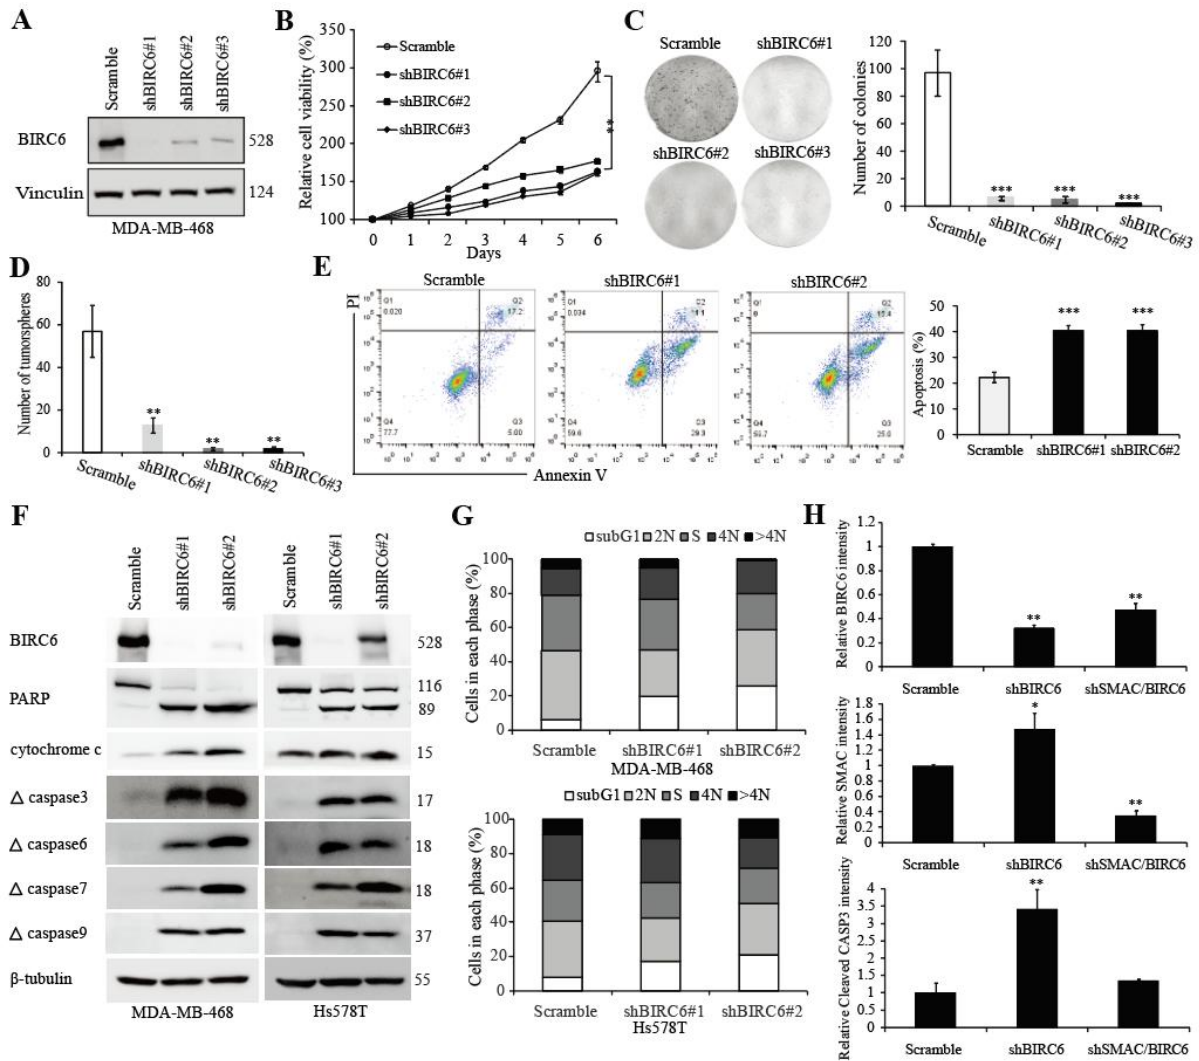

**Fig. S2 (related to Fig. 4). BIRC6 Promotes TNBC Cell Growth and Tumorigenesis by Blocking SMAC-Mediated Apoptosis.** Immunoblotting analysis (A), MTT assay showing growth (B), colony formation assay (C) and tumorsphere assay (D) were performed in MDA-MB-468 cells transduced with scramble or BIRC6 shRNA. (E) Representative plots of cell apoptosis analysis (left) and data quantification of the apoptotic cells (right) in MDA-MB-468 cells with or without BIRC6 knockdown. (F) Immunoblot analysis of the indicated proteins in MDA-MB-468 and Hs578T cells transduced with scramble or two independent BIRC6 shRNAs. (G) Cell cycle distribution in MDA-MB-468 (upper) and Hs578T (lower) cells was assessed by PI staining followed by flow cytometry analysis. (H) The immunoreactive areas in the IHC images were quantified using ImagePro Plus 6.0 software. Data are means  $\pm$  SD. \*\* $P$ <0.01, \*\*\* $P$ <0.001.

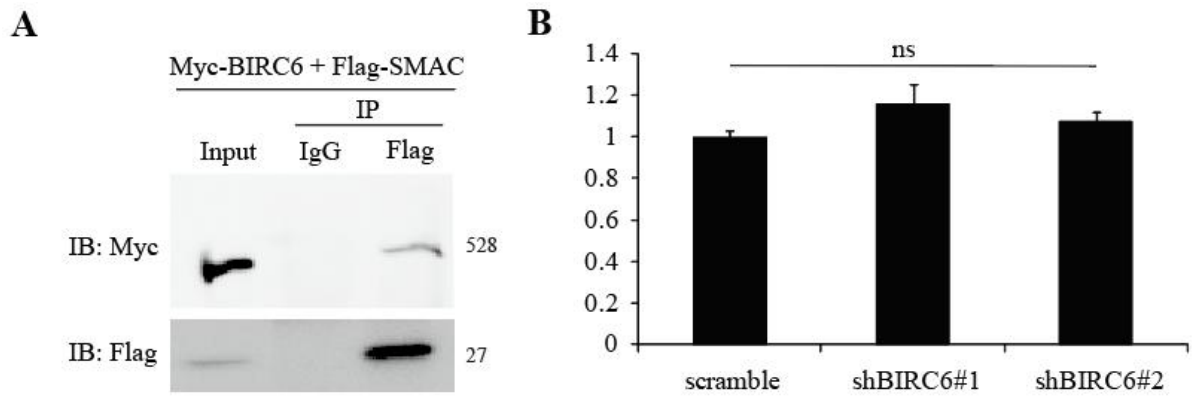

**Fig. S3 (related to Fig. 5). BIRC6 Decreases SMAC Expression by Regulating Ubiquitination in TNBC.** (A) After transiently transfected with myc-tagged BIRC6, Flag-tagged SMAC, 293T cells were immunoprecipitated with anti-Flag antibody then subjected to western blot analysis. (B) qRT-PCR analysis was performed to measure the mRNA levels of SMAC in Hs578T cells transduced with scramble or BIRC6 shRNA. Data are means  $\pm$  SD.

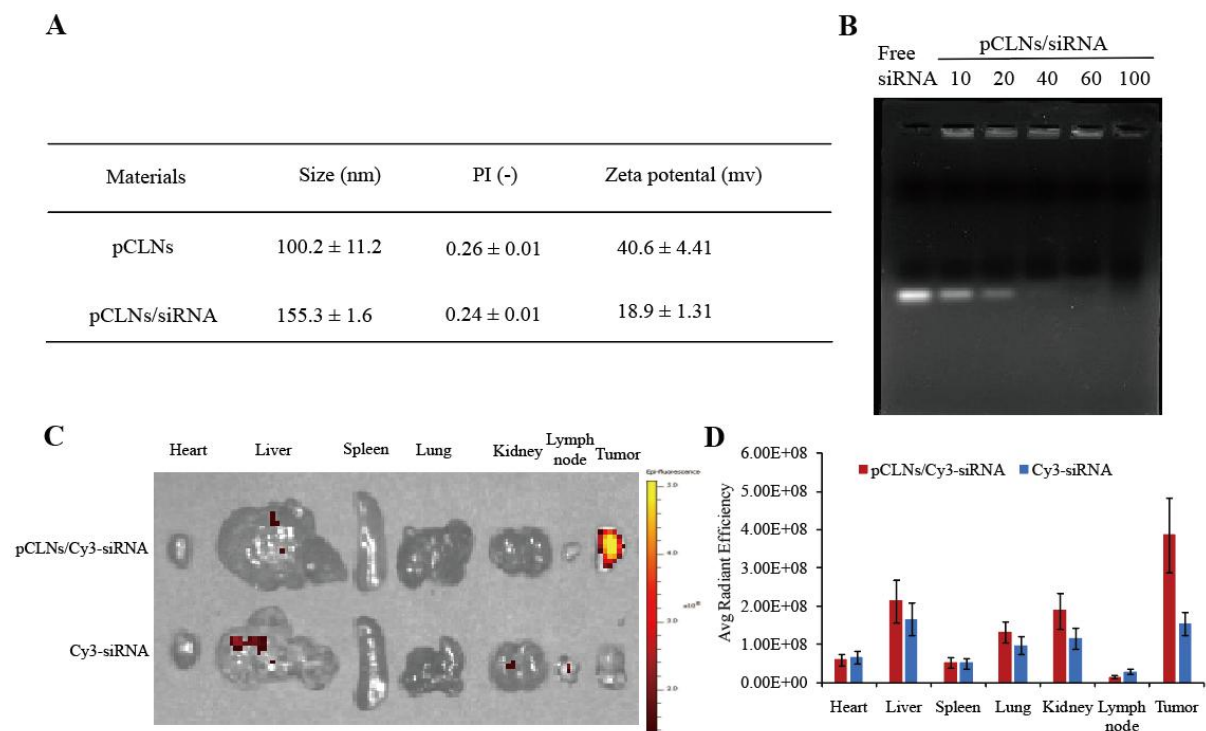

**Fig. S4 (related to Fig. 6). pCLNs Can Efficiently Deliver the BIRC6-siRNA into TNBC Cells *in vitro* and *in vivo*.** (A) Sizes and zeta potentials of pCLNs and pCLNs/siRNA. Data are means  $\pm$  SD (n = 3). PI: polydispersity index. (B) Gel retardation assay was performed to test the binding ability of pCLNs to siRNA at different mass ratios. (C) Ex vivo images of major organs at 36 h post i.v.

injection with pCLNs/Cy3-siRNA or Cy3-siRNA. (D) The average fluorescence intensity of major organs after mice injected with pCLNs/Cy3-siRNA or Cy3-siRNA for 36h (n = 3).

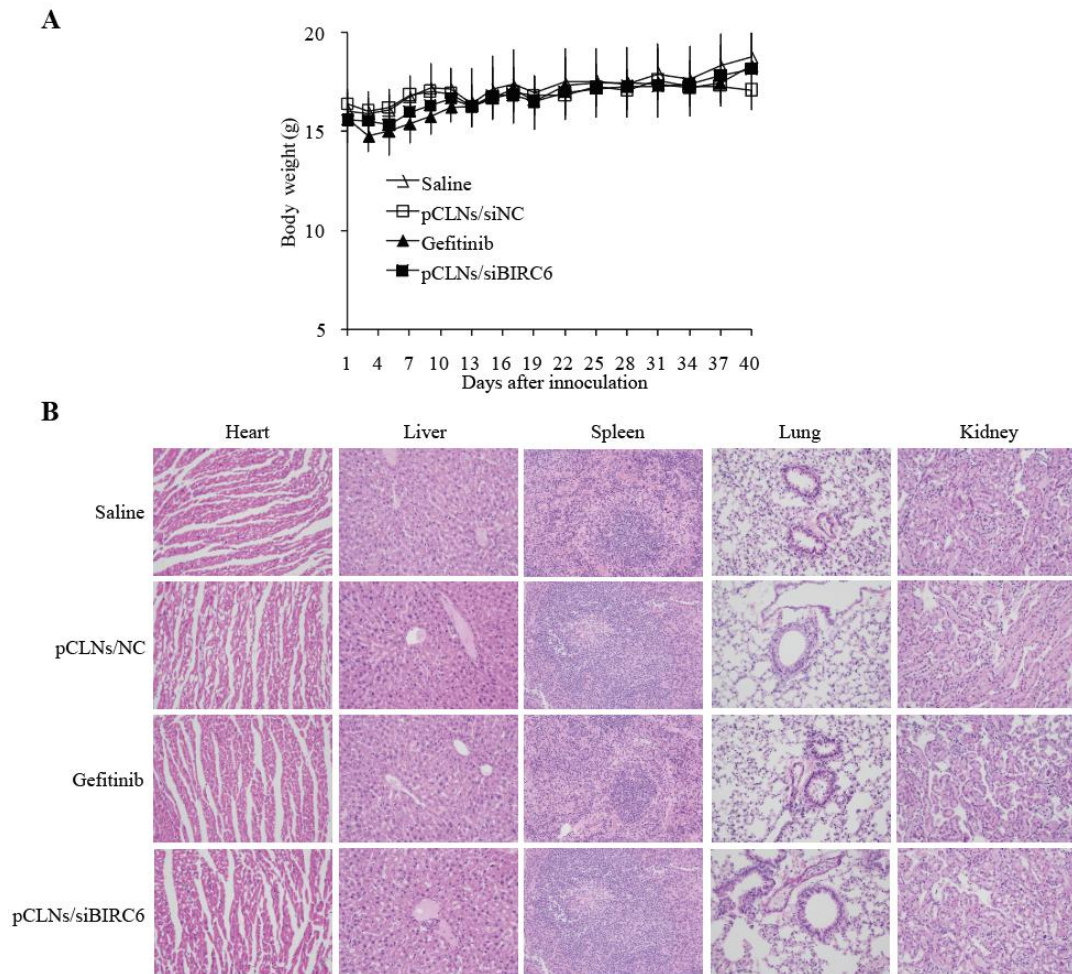

**Fig. S5 (related to Fig. 7). pCLNs/siBIRC6 Complex is safe for TNBC therapy. (A)** Body weight in MDA-MB-468 xenograft-bearing mice receiving various treatments. **(B)** Representative images of H&E staining of major organs in MDA-MB-468 xenograft-bearing mice receiving various treatments.

**Table S1 The oligonucleotide sequences for shRNA interference.**

| Gene      | Sequence              | Index                                                                                       |
|-----------|-----------------------|---------------------------------------------------------------------------------------------|
| BIRC6 #1  | GCTGTAGTGAATGGTGCAAAT | TRCN0000004159                                                                              |
| BIRC6 #2  | GCGTTCTTTCTACAGTGCATT | TRCN0000004158                                                                              |
| BIRC6 #3  | AAACTACCTTAGGAAAGAATG | <a href="http://jura.wi.mit.edu/bio/c/siRNAext/">http://jura.wi.mit.edu/bio/c/siRNAext/</a> |
| HECTD1 #1 | TCTCTCTTTGTTTGGCATATA | TRCN0000004087                                                                              |
| HECTD1 #2 | GCCACGAACAACATGAATCTA | TRCN0000004084                                                                              |

|          |                       |                |
|----------|-----------------------|----------------|
| SMAC #1  | CCGACAATATACAAGTTTACT | TRCN0000004513 |
| SMAC #2  | GCGTTGATTGAAGCTATTACT | TRCN0000004512 |
| CASP9    | CAGCTTCCAGATTGACGACAA | TRCN0000318563 |
| HtrA2    | GATCACATCCGGCATTGTTAG | TRCN0000344116 |
| TP53     | CGGCGCACAGAGGAAGAGAAT | TRCN0000003753 |
| EGFR #1  | GCTGCTCTGAAATCTCCTTTA | TRCN0000121067 |
| EGFR #2  | GAGAATGTGGAATACCTAAGG | TRCN000010329  |
| Scramble | CCTAAGGTTAAGTCGCCCTCG | Addgene #1864  |
